# Supplementary material for: Neuroimaging in the Acute Psychiatric Setting: Associations With Neuropsychiatric Risk Factors
Source: Atypon-hosted journal article supplement (doi:10.1176/appi.neuropsych.21110269), 2022-09-21
Supplement: appi.neuropsych.21110269.ds001.pdf [file appi.neuropsych.21110269.ds001.pdf]

## Supplemental Data

### Appendix S1: Abnormal neurological examination findings among adult psychiatric inpatients who underwent brain MRI

| <b>Known neurological/intracranial condition (N=17) and associated examination findings</b>                                                          |                                                                                               |
|------------------------------------------------------------------------------------------------------------------------------------------------------|-----------------------------------------------------------------------------------------------|
| Alcoholic peripheral neuropathy; previous chronic traumatic subdural haematoma                                                                       | Bilateral reduced sensation below knee; left eye corneal opacity                              |
| Arteriovenous malformation (right occipital lobe)                                                                                                    | Bradykinesia; hypometric saccades; mild parkinsonism                                          |
| Cerebral palsy; epilepsy; mild learning difficulty                                                                                                   | Mild gait abnormalities; limited movement of right arm; wrist drop                            |
| Chronic obstructive hydrocephalus (severe)                                                                                                           | Unable to perform alternating movements rapidly                                               |
| Epilepsy; intellectual disability                                                                                                                    | Upper limb hyperreflexia                                                                      |
| Head trauma with intracranial haemorrhage                                                                                                            | Slurred speech; upper limb stiffness                                                          |
| Huntington's disease                                                                                                                                 | Difficulty with rapid repetitive finger movements; bradykinesia; restlessness                 |
| Intracranial cyst overdue for follow up                                                                                                              | Ataxia                                                                                        |
| Meniere's disease                                                                                                                                    | Apraxia                                                                                       |
| Multiple sclerosis                                                                                                                                   | Significant myoclonus of left arm and leg; antalgic gait                                      |
| Multiple sclerosis                                                                                                                                   | Facial twitching/ spasm                                                                       |
| Subdural haemorrhage                                                                                                                                 | Latency of horizontal and vertical eye movements; dyspraxia; purposeless movements            |
| Temporal lobe epilepsy                                                                                                                               | Right eye lateral nystagmus; bilateral intention tremor; constructional apraxia               |
| Tic disorder; HIV                                                                                                                                    | Motor tics in neck                                                                            |
| Vascular dementia                                                                                                                                    | Poor luria; impaired set shifting; failed trail making test                                   |
| Vertigo (chronic)                                                                                                                                    | Left lateral nystagmus                                                                        |
| Vestibulopathy (bilateral)                                                                                                                           | Wide based shuffling gait; dysarthria; dysphonia; upbeat nystagmus; subtle dysdiadochokinesia |
| <b>No known condition (N=24)</b>                                                                                                                     |                                                                                               |
| Brisk reflexes globally; slow speech; diminished and slow movements globally; slow gait; significant psychomotor retardation                         |                                                                                               |
| Brisk reflexes left upper and lower limbs; area of sensory change over the left ankle, worse in the heat; left hand dysmetria; diplopia on left gaze |                                                                                               |
| Cervical and lumbar radiculopathy                                                                                                                    |                                                                                               |
| Difficulty initiating saccades; slow alternating movements; reduced arm swing; poor visuospatial awareness; retropulsion on Romberg's test           |                                                                                               |
| Dyscoordination; mildly ataxic gait; nystagmus                                                                                                       |                                                                                               |
| Dyscoordination; past pointing                                                                                                                       |                                                                                               |
| Dyscoordination                                                                                                                                      |                                                                                               |
| Dysdiadochokinesia (mild)                                                                                                                            |                                                                                               |
| Failed tandem gait                                                                                                                                   |                                                                                               |

|                                                                                                                                                                                                                                   |
|-----------------------------------------------------------------------------------------------------------------------------------------------------------------------------------------------------------------------------------|
| Fine tremor of bilateral upper limbs; tardive dyskinesic lip pouting; slow gait                                                                                                                                                   |
| Horizontal gaze palsy of bilateral abduction; tardive dyskinesic lip movements; bilateral fine postural tremor of upper limbs; bilateral dysdiadochokinesis; Parkinsonism with cogwheel rigidity, stooped posture, shuffling gait |
| Left blepharospasm; left partial ptosis; reduced abduction of left eye with blurring of vision; slow vertical saccades; reduced power in left upper limb                                                                          |
| Mildly slow horizontal saccades; mild past pointing on finger-nose-finger test for left upper limb                                                                                                                                |
| Nystagmus; ataxic gait; failed tandem gait; dyscoordination                                                                                                                                                                       |
| Nystagmus; ataxic gait; dyscoordination                                                                                                                                                                                           |
| Ocular hypometria; upper limb hyperreflexia; sacchadic intrusions; finger jerks positive; positive Hoffman's sign; mildly increased tone; oppositional paratonia (gegenhalten)                                                    |
| Optic apraxia; severely impaired luria                                                                                                                                                                                            |
| Reduced lower limb reflexes and sensation; failed tandem gait; reduced vibration sensation                                                                                                                                        |
| Right facial droop; nystagmus on right gaze; muscle wasting; fasciculations; peripheral neuropathy                                                                                                                                |
| Right hand weakness                                                                                                                                                                                                               |
| Right-sided weakness; bilateral upper limb intention tremor                                                                                                                                                                       |
| Slow coordination; difficulty following commands                                                                                                                                                                                  |
| Slowed vertical saccades; reduced arm swing; retropulsion on Romberg's test; mild extrapyramidal features and eye movement disorder                                                                                               |
| Tardive dystonia; Parkinsonian tremor; neck stiffness; dizziness                                                                                                                                                                  |
| Tremor; horizontal nystagmus; dysdiadochokinesis on heel-shin test                                                                                                                                                                |
| <b>Medication-related abnormal neurological examination findings (N=4)</b>                                                                                                                                                        |
| Bilateral upper limb cogwheel rigidity                                                                                                                                                                                            |
| Orobuccal tardive dyskinesia; akathisia                                                                                                                                                                                           |
| Parkinsonism with stooped posture, shuffling gait, tremor, cogwheel rigidity                                                                                                                                                      |
| Upper limb stiffness; slurred speech                                                                                                                                                                                              |

## Appendix S2: Indications for MRI with overlap of multiple indications by category

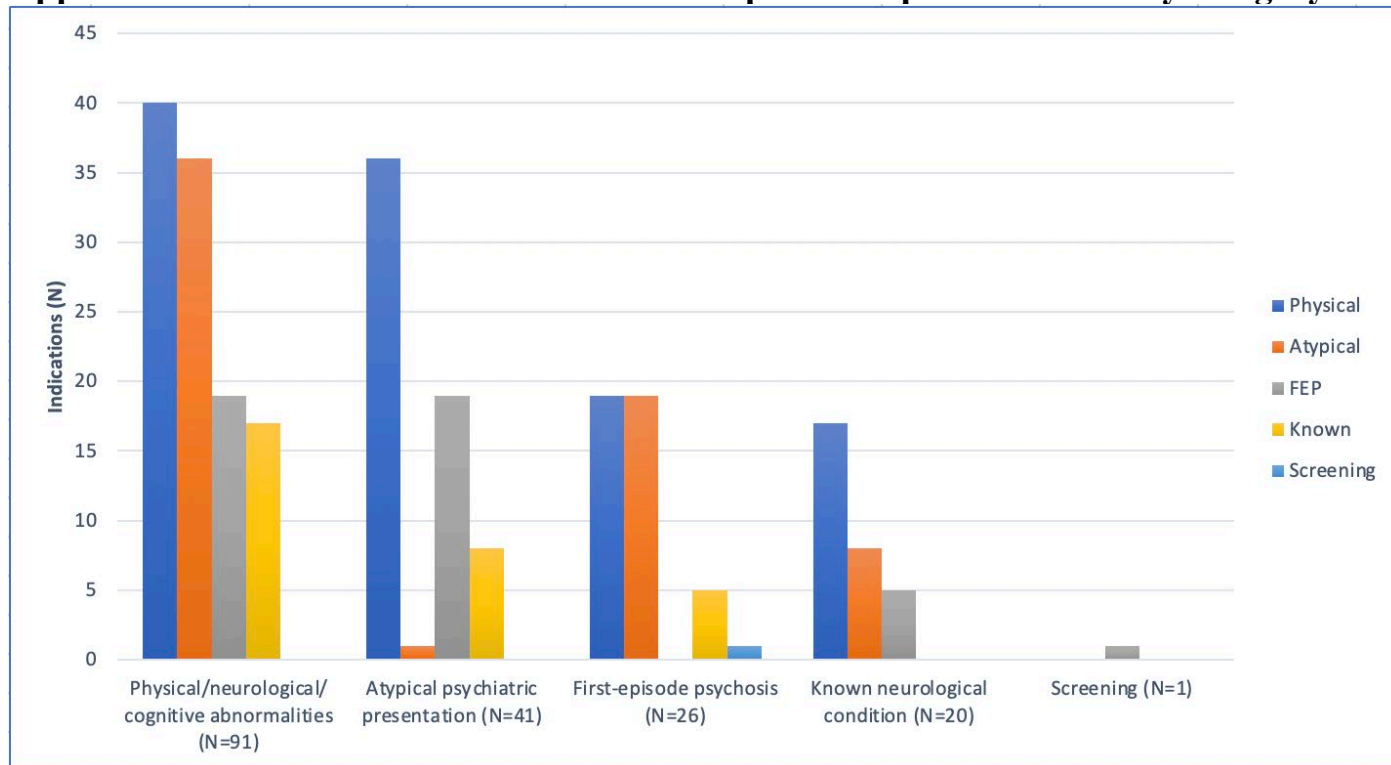

Overlap of multiple indications by category. For example, there were 26 patients who had FEP as an indication for scanning; of those, 19 also had physical abnormalities, 19 had an atypical psychiatric presentation, none were referred exclusively for FEP, five had a known condition, and one was referred for screening. Note that the total number of indications exceeds 100 due to multiple indications per patient: 37 patients had two indications, 18 had three indications, and two had four indications.

### Appendix S3: Types of MRI abnormalities according to urgency of follow up

|                                        |                                                                                                                                                                                                                                                                                                                                                                                                                                                                                                                                                                              |
|----------------------------------------|------------------------------------------------------------------------------------------------------------------------------------------------------------------------------------------------------------------------------------------------------------------------------------------------------------------------------------------------------------------------------------------------------------------------------------------------------------------------------------------------------------------------------------------------------------------------------|
| <b>No abnormality</b><br>(N=21)        |                                                                                                                                                                                                                                                                                                                                                                                                                                                                                                                                                                              |
| <b>No referral necessary</b><br>(N=22) | Cavum septum pellucidum<br>Developmental abnormalities (structural, venous)<br>Ependymitis granularis (normal variant)<br>Haemangioma<br>Microhemorrhage<br>Prominent sulci/gyri for age (pt95)<br>White matter hyperintensities                                                                                                                                                                                                                                                                                                                                             |
| <b>Routine referral</b><br>(N=43)      | Alcohol-related dementia<br>Generalised atrophy<br>Possible demyelinating disease<br>Prominent calcification of cortex and deep grey matter for age<br>Prominent chronic small vessel ischemia for age/vascular disease<br>Prominent white matter hyperintensities for age<br>Regional atrophy (frontal/parietal/temporal/hippocampus/cerebellar)<br>Regional hypoperfusion (parietal, temporal, occipital)<br>Stable known disorder (Huntington's disease, multiple sclerosis, tuberous sclerosis, ocular abnormalities)<br>Traumatic changes<br>Treated neurocysticercosis |
| <b>Urgent referral</b><br>(N=14)       | Arachnoid cyst<br>Cholesteatoma<br>Intracranial hypertension/possible normal pressure hydrocephalus<br>Possible frontotemporal dementia<br>Possible Lewy body dementia<br>Possible toxic disorder<br>Progressive global atrophy<br>Severe chronic obstructive hydrocephalus<br>Vascular lesion (arteriovenous malformation, cavernoma, aneurism)                                                                                                                                                                                                                             |
| <b>Immediate referral</b><br>(N=0)     |                                                                                                                                                                                                                                                                                                                                                                                                                                                                                                                                                                              |
